# Supplementary material for: Genomic and phylogenetic analysis of choriolysins, and biological activity of hatching liquid in the flatfish Senegalese sole
Source: PubMed Central journal article supplement (PMC6894847; doi:10.1371/journal.pone.0225666), 2019-12-05

A)

|         |                                                                                                     |    |    |    |    |    |    |    |    |     |
|---------|-----------------------------------------------------------------------------------------------------|----|----|----|----|----|----|----|----|-----|
|         | 10                                                                                                  | 20 | 30 | 40 | 50 | 60 | 70 | 80 | 90 | 100 |
| EHE12   | MD----QRLISTILALLLSLSLAHHVEDLESEDANEIEDPDDLITTRIMQSNNGSIEMLMEGDLLVSNTRNAMKCRNN--RCLWKKSSNGLVEVPYTVS |    |    |    |    |    |    |    |    |     |
| SseHCEa | .T----PT-V.LL.L...G..R..PLH.-----EGN..E..V.....LT...ATD.I.L....APK.....WYQ--S.Q...GY...TI.F...      |    |    |    |    |    |    |    |    |     |
| SseHCEb | .T----PT-V.LL.L...G..R..PLH.-----E.N..E..V.....LT...ATD.I.L....APK.....WYQ--S.Q...GN...TI.F...      |    |    |    |    |    |    |    |    |     |
| SseLCE  | ..FNTSTSVPLLL.L...GF.K..DDN.QGAVHDLSDMSQSAKE.F.AT.LRM...SDF.L...VMIP.....I.EPYS...P..A..Y..I.FIL.   |    |    |    |    |    |    |    |    |     |
| SseHE   | ..----LT.L.AVFTV..GF.AQS.SLVRSHDEGVDPDPSQR...S..LGA.RRVSQI.V...VAI.K.....WGG--Y..T....Y.....I.      |    |    |    |    |    |    |    |    |     |

  

|         |                                                                                                      |     |     |     |     |     |     |     |     |     |
|---------|------------------------------------------------------------------------------------------------------|-----|-----|-----|-----|-----|-----|-----|-----|-----|
|         | 110                                                                                                  | 120 | 130 | 140 | 150 | 160 | 170 | 180 | 190 | 200 |
| EHE12   | RQFSYYQGRRIVKAMKTFNTQTCTIRFVPRSRQRDYISIKSRGGCYSLGRTGGKQVVS LAKYGCVYHGIIQHESHALGFYHEHTRSDRNKYVKINWENV |     |     |     |     |     |     |     |     |     |
| SseHCEa | S..TSWEKQK.DS...VYHSS.....QNEY.....EN.A..F.A..V..R..L..NRQ...L...VVL...IN.....Q..Q...DN.....YI       |     |     |     |     |     |     |     |     |     |
| SseHCEb | S..TSWEKQK.DS...VYHSS.....QNEY.....EN.A..F.A..V..R..L..NRQ...L...VVL...IN.....Q..Q...DN.....YI       |     |     |     |     |     |     |     |     |     |
| SseLCE  | EKYD.SEKTL.LA..RG.QSK..V..I..AT..A.L..EP.Y..S.L..Y..D..L..QR...INN.....ML.....DQ.IR.....I            |     |     |     |     |     |     |     |     |     |
| SseHE   | DYYYDSEKAS.L...E..HQK..V...HRG.T..L..E.EL..W.SV..D..H....SV...LE..T...L...H.....DR..R...G..          |     |     |     |     |     |     |     |     |     |

  

|         |                                                                                 |     |     |     |     |     |     |
|---------|---------------------------------------------------------------------------------|-----|-----|-----|-----|-----|-----|
|         | 210                                                                             | 220 | 230 | 240 | 250 | 260 | 270 |
| EHE12   | APRSIYNFQKQNTNNLNTPYDYTSIMHYGKTAFTSN-GKDTITPIP NPKQSIGQRRSMSGDILRIKKLYNCCKKRNI. |     |     |     |     |     |     |
| SseHCEa | N.QNA...Y.....V...R...TVQY.R.....NVQ....PG..RW..I..NA..G..                      |     |     |     |     |     |     |
| SseHCEb | N.QNA...Y.....S.V...R...TVQY.R.....NVQ....G..RW..I..NA..G..                     |     |     |     |     |     |     |
| SseLCE  | NKYFV...R.MD.D.....S.V...R...G.Q-RQE...TYD.SAT...EGL.NI..F..N...R..WGFSG.       |     |     |     |     |     |     |
| SseHE   | QAMNK.D.H.KD.....V...R.V..SGF.-.....DSSVAV..SKE..DI.....NR..R..----             |     |     |     |     |     |     |

B)

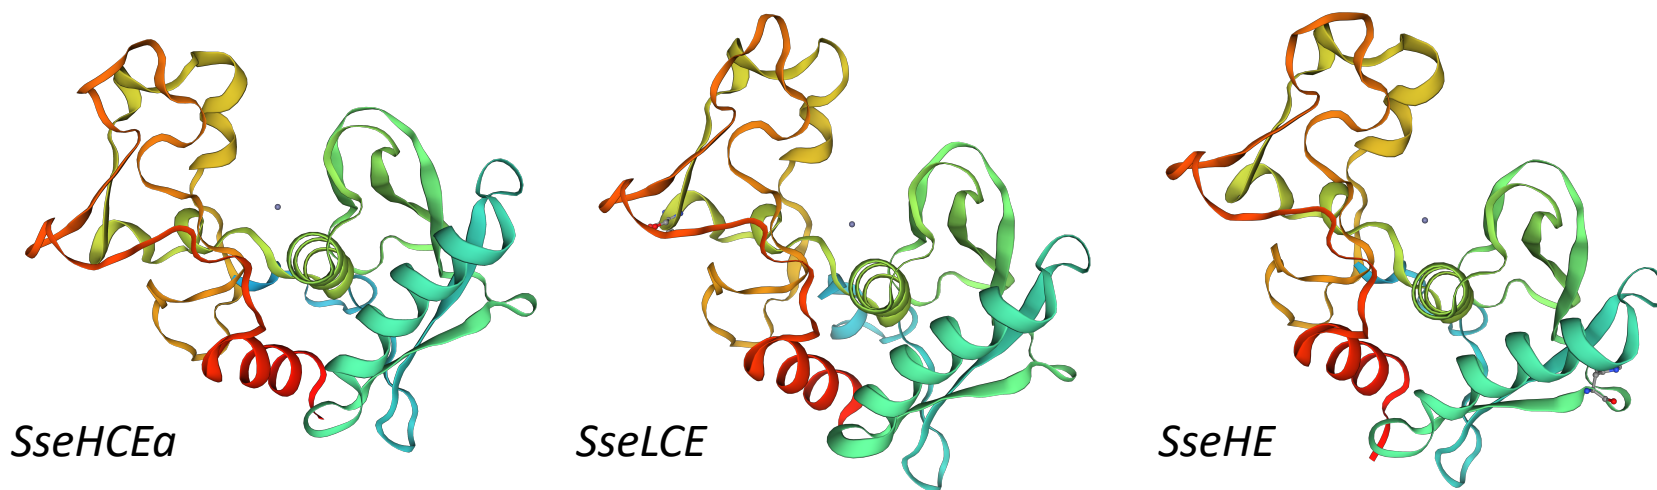

Supplement: pone.0225666.s003.pdf [file pone.0225666.s003.pdf]
