# Supplementary material for: Genomic and phylogenetic analysis of choriolysins, and biological activity of hatching liquid in the flatfish Senegalese sole
Source: PubMed Central journal article supplement (PMC6894847; doi:10.1371/journal.pone.0225666), 2019-12-05

# *SseHCEa*

6h BH

1h BH

hatching

6h PH

24h PH

Lateral view

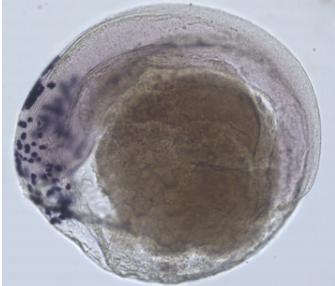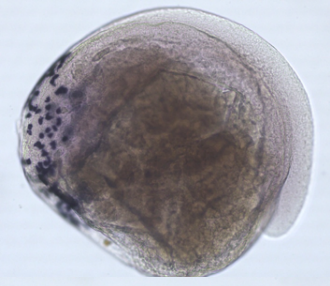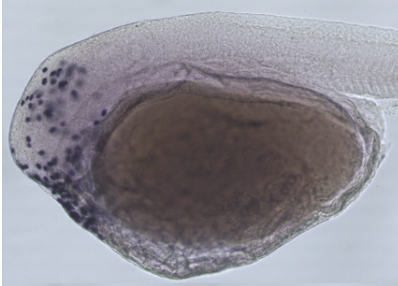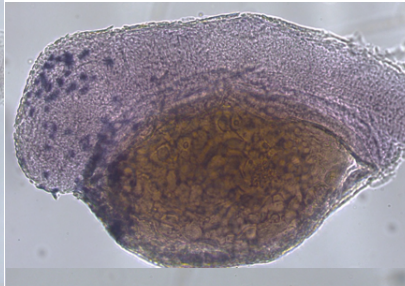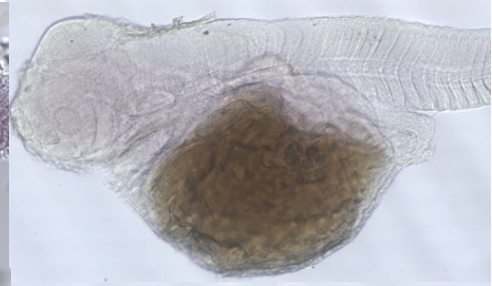

Dorsal view

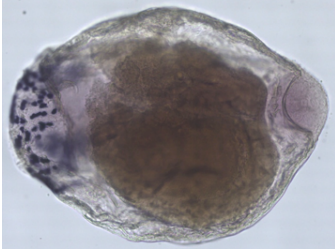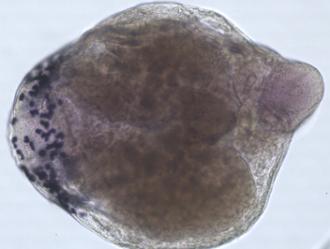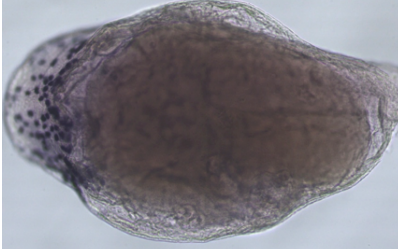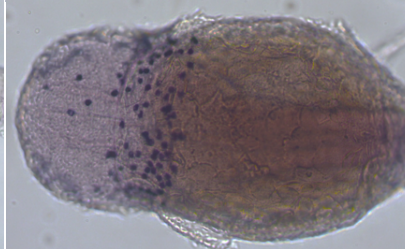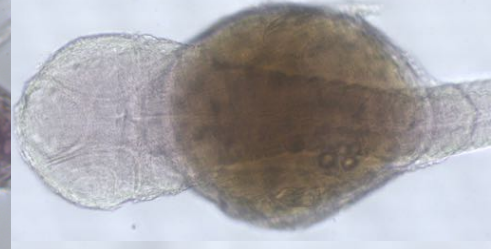

Ventral view

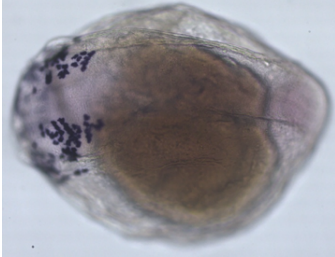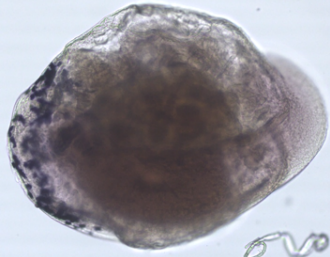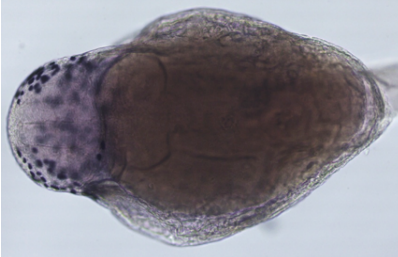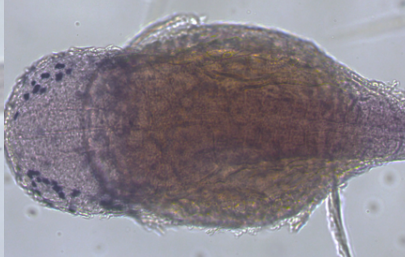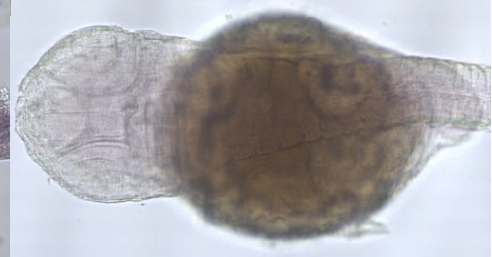

# *SseHCEb*

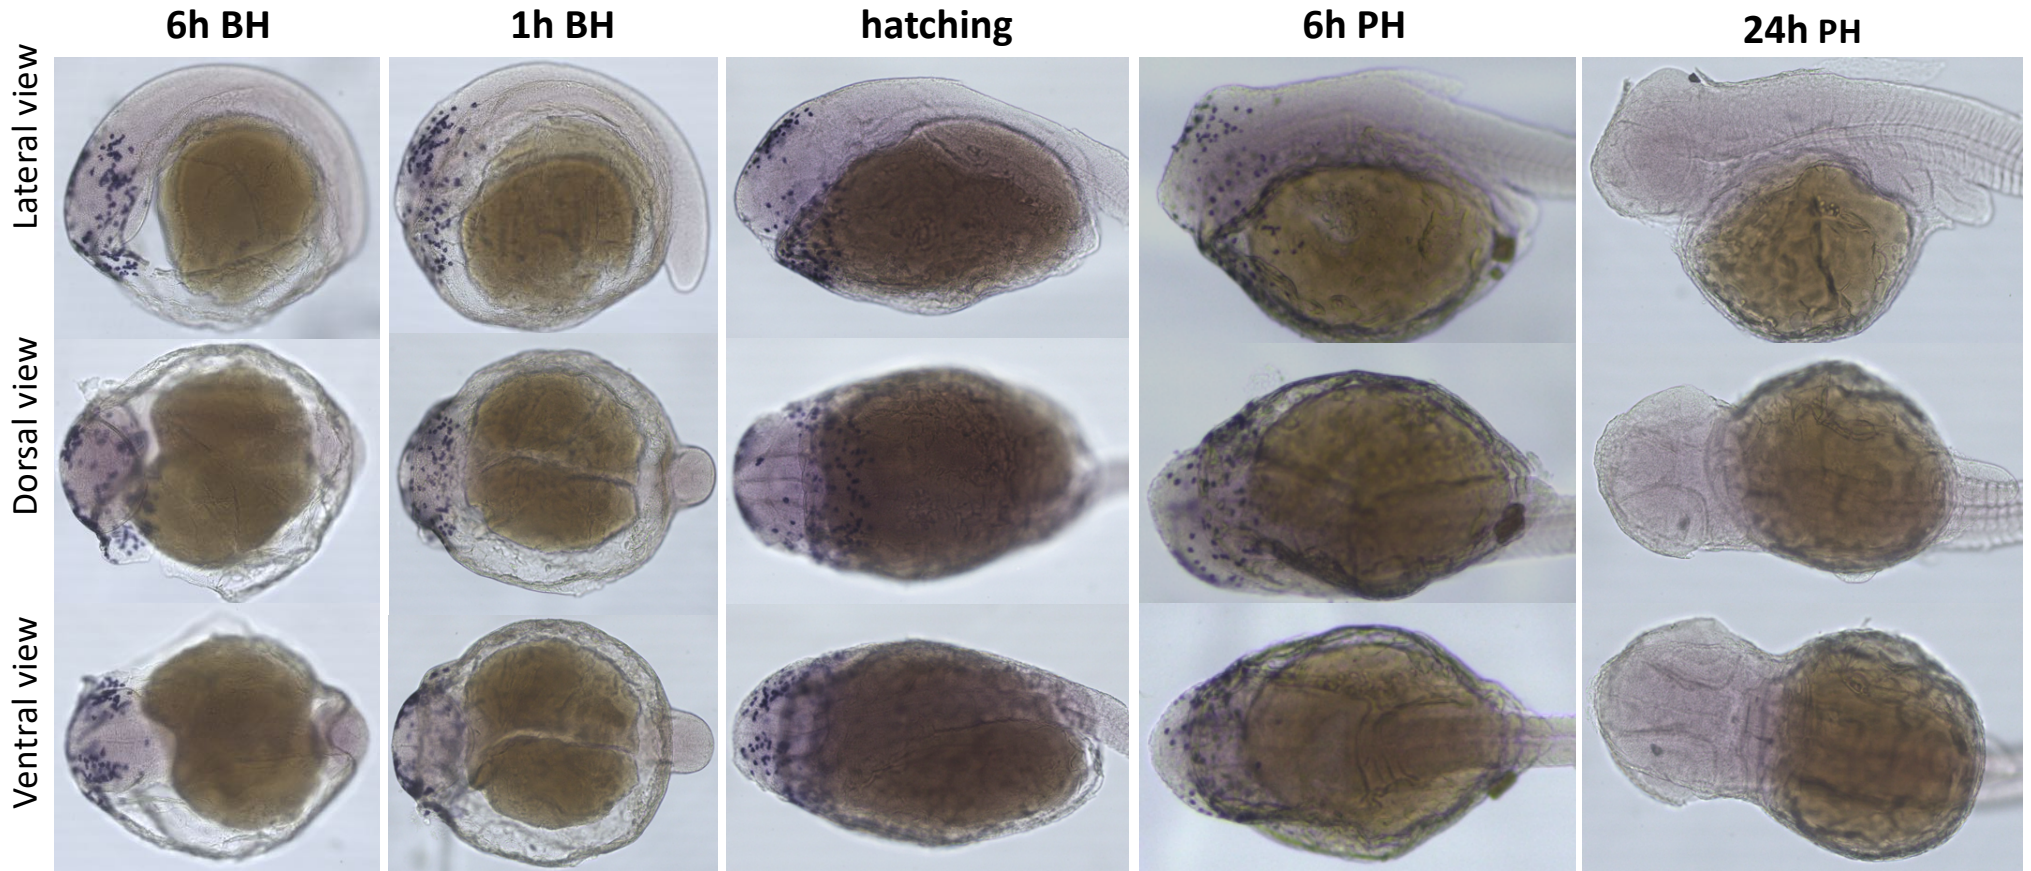

# *SseHE*

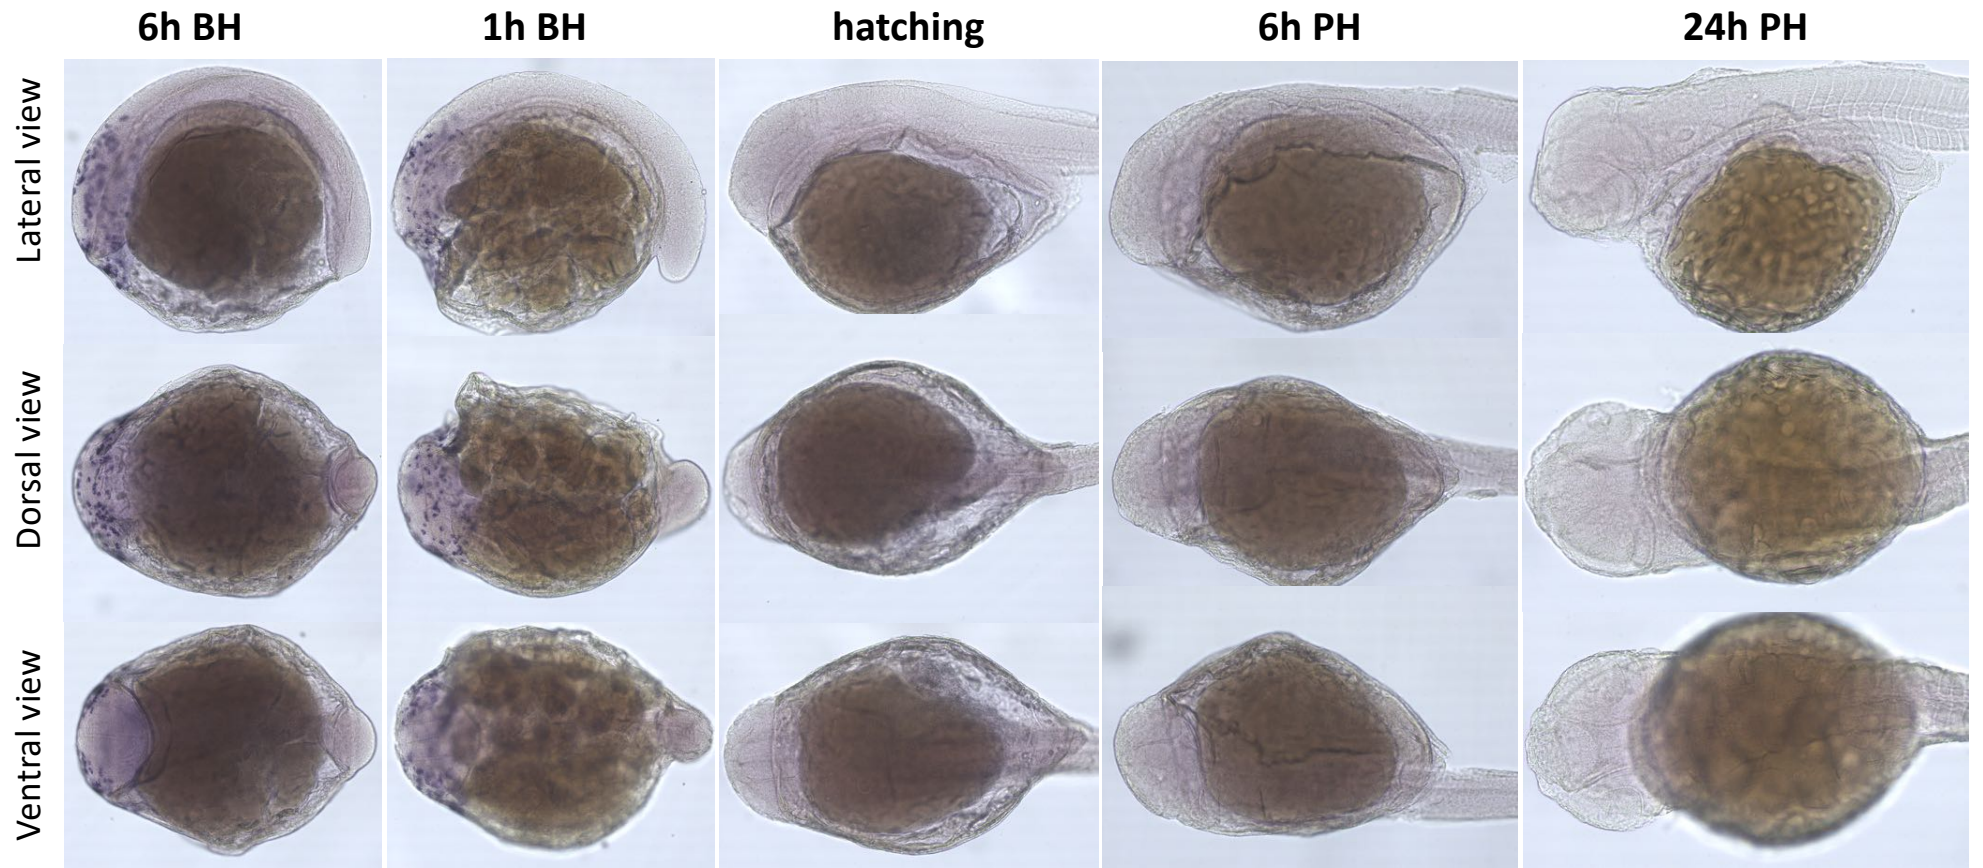

# *SseLCE*

6h BH

1h BH

hatching

6h PH

24h PH

Lateral view

Dorsal view

Ventral view

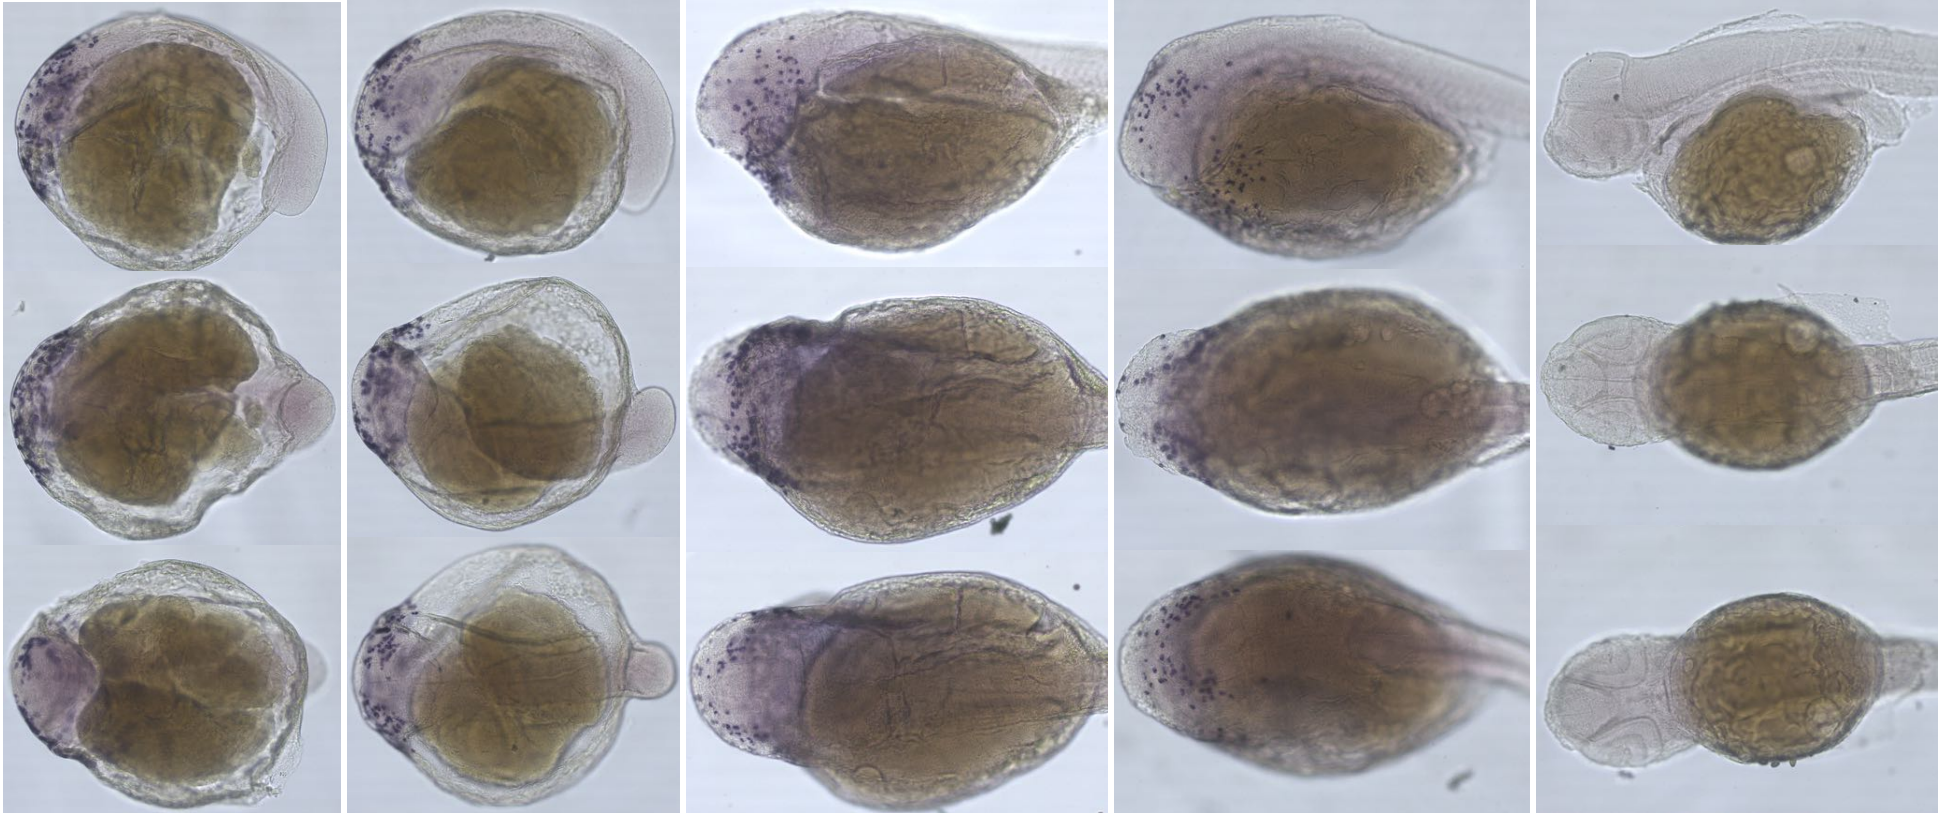

**Sense probe** 6h BH

1h BH

Hatching

6h PH

24h PH

*SseHE*

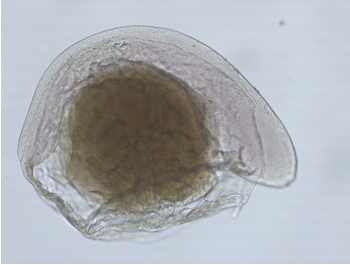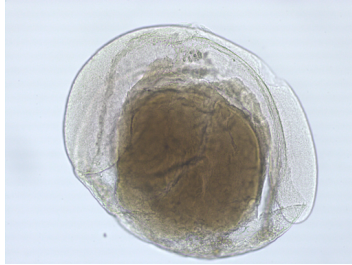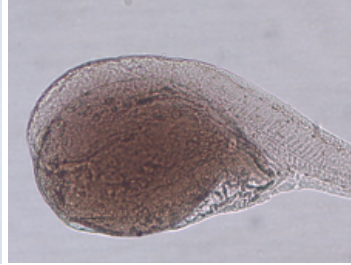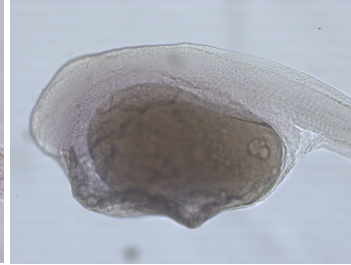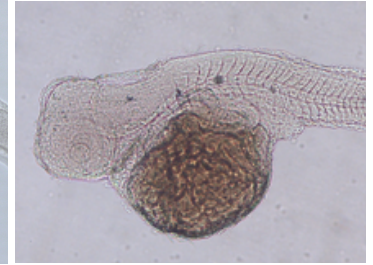

*SseLCE*

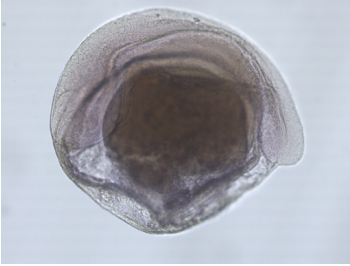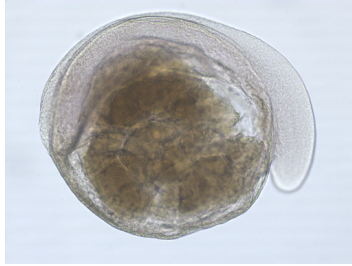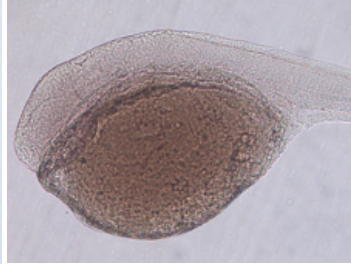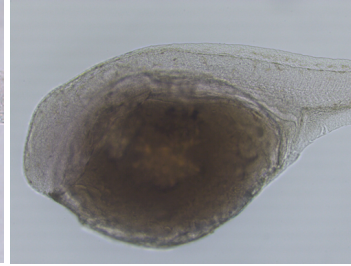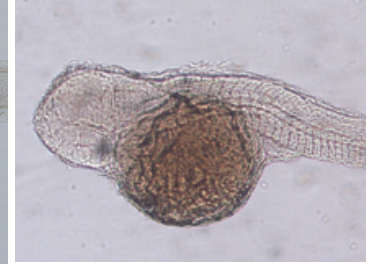

*SseHCE1a*

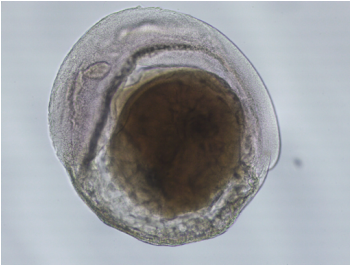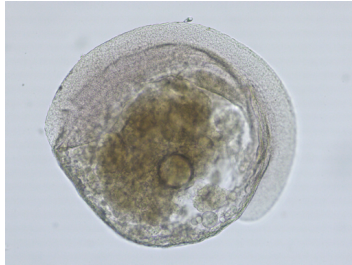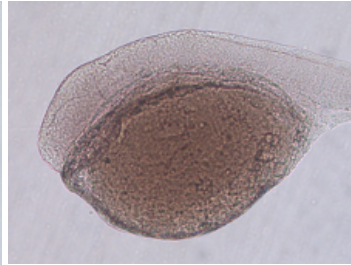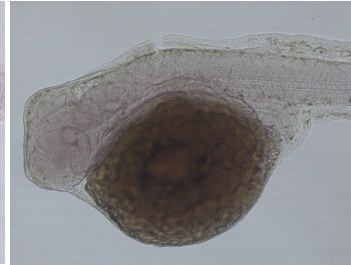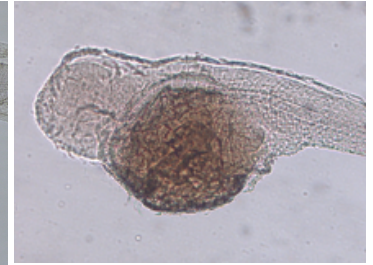

*SseHCE1b*

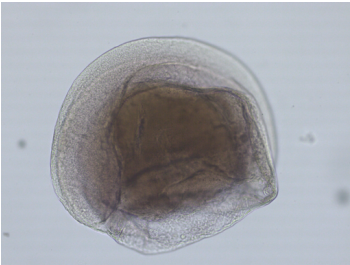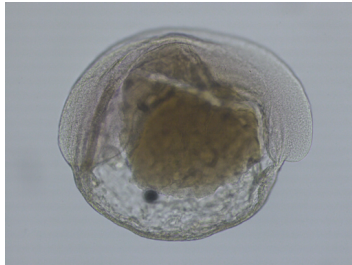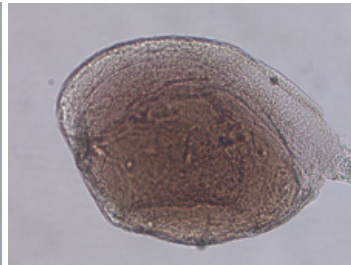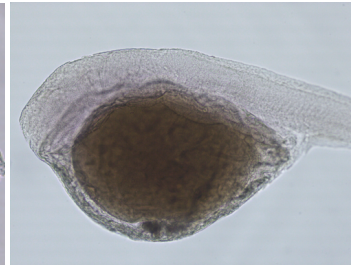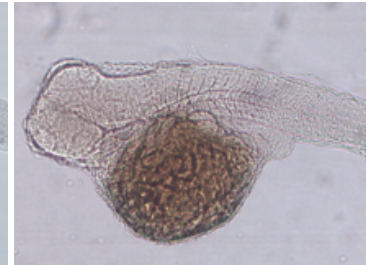

Supplement: pone.0225666.s004.pdf [file pone.0225666.s004.pdf]
