# Supplementary material for: Genomic and phylogenetic analysis of choriolysins, and biological activity of hatching liquid in the flatfish Senegalese sole
Source: PubMed Central journal article supplement (PMC6894847; doi:10.1371/journal.pone.0225666), 2019-12-05

180 -  
130 -  
100 -  
75 -  
63 -  
48 -  
35 -  
28 -  
17 -

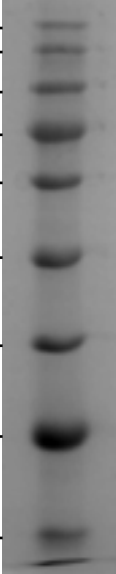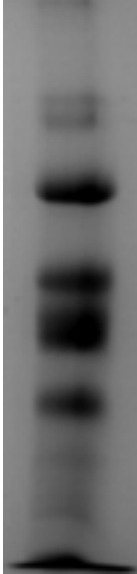

Supplement: pone.0225666.s005.pdf [file pone.0225666.s005.pdf]
